# Supplementary material for: Machine Learning Methods to Identify Predictors of Psychological Distress
Source: MDPI journal article supplement (doi:10.3390/pr10051030), 2022-05-22
Supplement: s1 [file s1]

Archive with 1 entries (1 files):
- processes-1717743-supplementary.pdf
