# Supplementary material for: Machine Learning Methods to Identify Predictors of Psychological Distress
Source: MDPI journal article supplement (doi:10.3390/pr10051030), 2022-05-22
Supplement: s1 [file s1 › processes-1717743-supplementary.pdf]

**Table S1. Variables extracted from the HINTS database for this research.**

| Variable                     | Questions from the HINTS                                                                                                                                                                                                                                                                     | Options and coding                                                                                                                                                                                                              | Coding used in this article                                                                             |
|------------------------------|----------------------------------------------------------------------------------------------------------------------------------------------------------------------------------------------------------------------------------------------------------------------------------------------|---------------------------------------------------------------------------------------------------------------------------------------------------------------------------------------------------------------------------------|---------------------------------------------------------------------------------------------------------|
| <b>Dependent variable</b>    |                                                                                                                                                                                                                                                                                              |                                                                                                                                                                                                                                 |                                                                                                         |
| PsychologicalDistress        | Over the past two weeks, how often have you been bothered by any of the following problems?<br>a. Little interest or pleasure in doing things,<br>b. Feeling down, depressed, or hopeless,<br>c. Feeling nervous, anxious, or on edge, and<br>d. Not being able to stop or control worrying. | 1. Nearly every day<br>2. More than half the days<br>3. Several days<br>4. Not at all                                                                                                                                           | People without psychological Distress:<br>a=4&b=4&c=4&d=4<br>People with psychological Distress: others |
| <b>Demographic variables</b> |                                                                                                                                                                                                                                                                                              |                                                                                                                                                                                                                                 |                                                                                                         |
| Gender                       | Selfgender                                                                                                                                                                                                                                                                                   | Male<br>Female                                                                                                                                                                                                                  | Male<br>Female                                                                                          |
| Race                         | What is your race? One or more categories may be selected.                                                                                                                                                                                                                                   | White; Mexican; PuertoRican; Cuban; NotHisp; OthHisp; AmerInd Black; AsInd; Chinese; Filipino; OthAsian; OthPacIsl;<br>1. Yes<br>2. No                                                                                          | Non-Hispanic white: White=1&others=2<br>Racial and ethnic minority: others                              |
| Education                    | Education: What is the highest grade or level of schooling you completed?                                                                                                                                                                                                                    | 1. Less than 8 years<br>2. 8 through 11 years<br>3. 12 years or completed high school<br>4. Post high school training other than college (vocational or technical)<br>5. Some college<br>6. College graduate<br>7. Postgraduate | >High school: 4, 5, 6, 7<br>≤High school: 1, 2, 3                                                       |
| Income                       | IncomeRanges: Thinking about members of your family living in this household, what is your combined annual income, meaning the total pre-                                                                                                                                                    | 1. \$0 to \$9,999<br>2. \$10,000 to \$14,999<br>3. \$15,000 to \$19,999<br>4. \$20,000 to \$34,999<br>5. \$35,000 to \$49,999                                                                                                   | ≥\$20,000: 4, 5, 6, 7, 8, 9<br><\$20,000: 1, 2, 3                                                       |

|                                |                                                                                                                                                                                                                                                         |                                                                                                                                                                                                                                                   |                                                            |
|--------------------------------|---------------------------------------------------------------------------------------------------------------------------------------------------------------------------------------------------------------------------------------------------------|---------------------------------------------------------------------------------------------------------------------------------------------------------------------------------------------------------------------------------------------------|------------------------------------------------------------|
|                                | tax income from all sources earned in the past year?                                                                                                                                                                                                    | 6. \$50,000 to \$74,999<br>7. \$75,000 to \$99,999<br>8. \$100,000 to \$199,999<br>9. \$200,000 or more                                                                                                                                           |                                                            |
| Area                           | RUC2013: USDA Rural/Urban Designation (2013)                                                                                                                                                                                                            | codes 1–9                                                                                                                                                                                                                                         | Metropolitan: codes 1–3<br>Non-metropolitan: codes 4–9     |
| Marital status                 | MaritalStatus: What is your marital status?                                                                                                                                                                                                             | 1. Married<br>2. Living as married or living with a romantic partner<br>3. Divorced<br>4. Widowed<br>5. Separated<br>6. Single, never been married                                                                                                | In marriage: 1, 2<br>Not in marriage: 3, 4, 5, 6           |
| BMI                            | Body Mass Index                                                                                                                                                                                                                                         | $(\text{Weight} \times 703) / (\text{Height in inches}^2)$                                                                                                                                                                                        | $(\text{Weight} \times 703) / (\text{Height in inches}^2)$ |
| Age                            | SelfAge                                                                                                                                                                                                                                                 | SelfAge___                                                                                                                                                                                                                                        | ___                                                        |
| <b>Other related variables</b> |                                                                                                                                                                                                                                                         |                                                                                                                                                                                                                                                   |                                                            |
| SeekCancerInfo                 | SeekCancerInfo: Have you ever looked for information about cancer from any source?                                                                                                                                                                      | 1. Yes<br>2. No                                                                                                                                                                                                                                   | Yes<br>No                                                  |
| UseInternet                    | UseInternet: Do you ever go on-line to access the Internet or World Wide Web, or to send and receive e-mail?                                                                                                                                            | 1. Yes<br>2. No                                                                                                                                                                                                                                   | Yes<br>No                                                  |
| WearableDevTrackHealth         | WearableDevTrackHealth: In the past 12 months, have you used an electronic wearable device to monitor or track your health or activity? For example, a Fitbit, Apple Watch, or Garmin Vivofit.                                                          | 1. Yes<br>2. No                                                                                                                                                                                                                                   | Yes<br>No                                                  |
| Social media user              | Sometimes people use the Internet to connect with other people online through social networks like Facebook or Twitter. This is often called “social media”.<br><br>In the past 12 months, have you used the Internet for any of the following reasons? | a. To visit a social networking site, such as Facebook or LinkedIn.<br><br>b. To share health information on social networking sites, such as Facebook or Twitter.<br><br>d. To participate in an online forum or support group for people with a | Yes: others<br>No : a=2&b=2&d=2&e=2                        |

|                          |                                                                                                                                                                                |                                                                                                                                                                |                                                                                                                           |
|--------------------------|--------------------------------------------------------------------------------------------------------------------------------------------------------------------------------|----------------------------------------------------------------------------------------------------------------------------------------------------------------|---------------------------------------------------------------------------------------------------------------------------|
|                          |                                                                                                                                                                                | similar health or medical issue.<br>e. To watch a health-related video on YouTube<br>1. Yes 2. No                                                              |                                                                                                                           |
| RegularProvider          | RegularProvider: Not including psychiatrists and other mental health professionals, is there a particular doctor, nurse, or other health professional that you see most often? | 1. Yes<br>2. No                                                                                                                                                | Yes<br>No                                                                                                                 |
| AccessOnlineRecord       | AccessOnlineRecord: How many times did you access your online medical record in the last 12 months?                                                                            | 0. 0<br>1. 1 to 2 times<br>2. 3 to 5 times<br>3. 6 to 9 times<br>4. 10 or more times                                                                           | Yes: 1, 2, 3, 4<br>No : 0                                                                                                 |
| Caregiving               | Are you currently caring for or making health care decisions for someone with a medical, behavioral, disability, or other condition?                                           | Caregiving_ No<br>1. Yes 2. No                                                                                                                                 | Yes: 2<br>No : 1                                                                                                          |
| GeneralHealth            | GeneralHealth: In general, would you say your health is...                                                                                                                     | 1. Excellent,<br>2. Very good,<br>3. Good,<br>4. Fair, or<br>5. Poor?                                                                                          | Good: 1, 2, 3<br>Poor: 4, 5                                                                                               |
| OwnAbilityTakeCareHealth | OwnAbilityTakeCareHealth: Overall, how confident are you about your ability to take good care of your health?                                                                  | 1. Completely confident<br>2. Very confident<br>3. Somewhat confident<br>4. A little confident<br>5. Not confident at all                                      | 1. Completely confident<br>2. Very confident<br>3. Somewhat confident<br>4. A little confident<br>5. Not confident at all |
| Deaf                     | Deaf: Are you deaf or do you have serious difficulty hearing?                                                                                                                  | 1. Yes<br>2. No                                                                                                                                                | Yes<br>No                                                                                                                 |
| TalkHealthFriends        | TalkHealthFriends: Do you have friends or family members that you talk to about your health?                                                                                   | 1. Yes<br>2. No                                                                                                                                                | Yes<br>No                                                                                                                 |
| MedConditions_Disease    | Has a doctor or other health professional ever told you that you had any of the following medical conditions:                                                                  | a. Diabetes or high blood sugar?<br>b. High blood pressure or hypertension?<br>c. A heart condition such as heart attack, angina, or congestive heart failure? | Yes: others<br>No:<br>a=2&b=2&c=2&d=2&e=2                                                                                 |

|               |                                                                                                                                                   |                                                                                                                                                                                                     |                                           |
|---------------|---------------------------------------------------------------------------------------------------------------------------------------------------|-----------------------------------------------------------------------------------------------------------------------------------------------------------------------------------------------------|-------------------------------------------|
|               |                                                                                                                                                   | d. Chronic lung disease, asthma, emphysema, or chronic bronchitis?<br>e. Depression or anxiety disorder?<br>1. Yes 2. No                                                                            |                                           |
| Drink         | DrinkDaysPerWeek: During the past 30 days, how many days per week did you have at least one drink of any alcoholic beverage?                      | ___Days per week                                                                                                                                                                                    | Yes: ___≠0<br>No : ___=0                  |
| Smoke         | Smoke100: Have you smoked at least 100 cigarettes in your entire life?<br>UsedECigEver: Have you ever used an e-cigarette, even one or two times? | 1.Yes<br>2. No                                                                                                                                                                                      | Yes<br>No                                 |
| EverHadCancer | EverHadCancer: Have you ever been diagnosed as having cancer?                                                                                     | 1.Yes<br>2. No                                                                                                                                                                                      | Yes<br>No                                 |
| Cancercheck   | A. WhenPapTest: How long ago did you have your most recent Pap test to check for cervical cancer?                                                 | 1. A year ago or less<br>2. More than 1, up to 2 years ago<br>3. More than 2, up to 3 years ago<br>4. More than 3, up to 5 years ago<br>5. More than 5 years ago<br>6. I have never had a Pap test  | Yes: others<br>No:<br>A=6&B=6&C=2&D=2&E=2 |
|               | B. WhenMammogram: When did you have your most recent mammogram to check for breast cancer, if ever?                                               | 1. A year ago or less<br>2. More than 1, up to 2 years ago<br>3. More than 2, up to 3 years ago<br>4. More than 3, up to 5 years ago<br>5. More than 5 years ago<br>6. I have never had a mammogram |                                           |
|               | C. EverTestedColonCa: Have you ever had one of these tests to check for colon cancer?                                                             | 1.Yes<br>2. No                                                                                                                                                                                      |                                           |
|               | D. HeardHPV: Have you ever heard of HPV? HPV stands for Human                                                                                     | 1.Yes<br>2. No                                                                                                                                                                                      |                                           |

|                         |                                                                                                                                                                          |                                                                              |                                                               |
|-------------------------|--------------------------------------------------------------------------------------------------------------------------------------------------------------------------|------------------------------------------------------------------------------|---------------------------------------------------------------|
|                         | Papillomavirus. It is not HCV, HIV, HSV, or herpes.                                                                                                                      |                                                                              |                                                               |
|                         | E. HeardHPVVaccine2: Before today, have you ever heard of the cervical cancer vaccine or HPV shot?                                                                       | 1.Yes<br>2. No                                                               |                                                               |
| FreqWorryCancer         | FreqWorryCancerNoDX: How worried are you about getting cancer?                                                                                                           | 1. Not at all<br>2. Slightly<br>3. Somewhat<br>4. Moderately<br>5. Extremely | Not at all<br>Slightly<br>Somewhat<br>Moderately<br>Extremely |
| Numeric variables       |                                                                                                                                                                          |                                                                              |                                                               |
| ModerateExerciseMinutes | HowLongModerateExerciseMinutes: On the days that you do any physical activity or exercise of at least moderate intensity, how long do you typically do these activities? | __Minutes per day                                                            | —                                                             |
